# Supplementary material for: Involvement of Mesenchymal Stem Cells in Oral Mucosal Bacterial Immunotherapy
Source: PubMed Central journal article supplement (PMC7711618; doi:10.3389/fimmu.2020.567391), 2020-11-19
Supplement: DataSheet_1.pdf [file DataSheet_1.pdf]

## SUPPLEMENTAL FIGURE S1

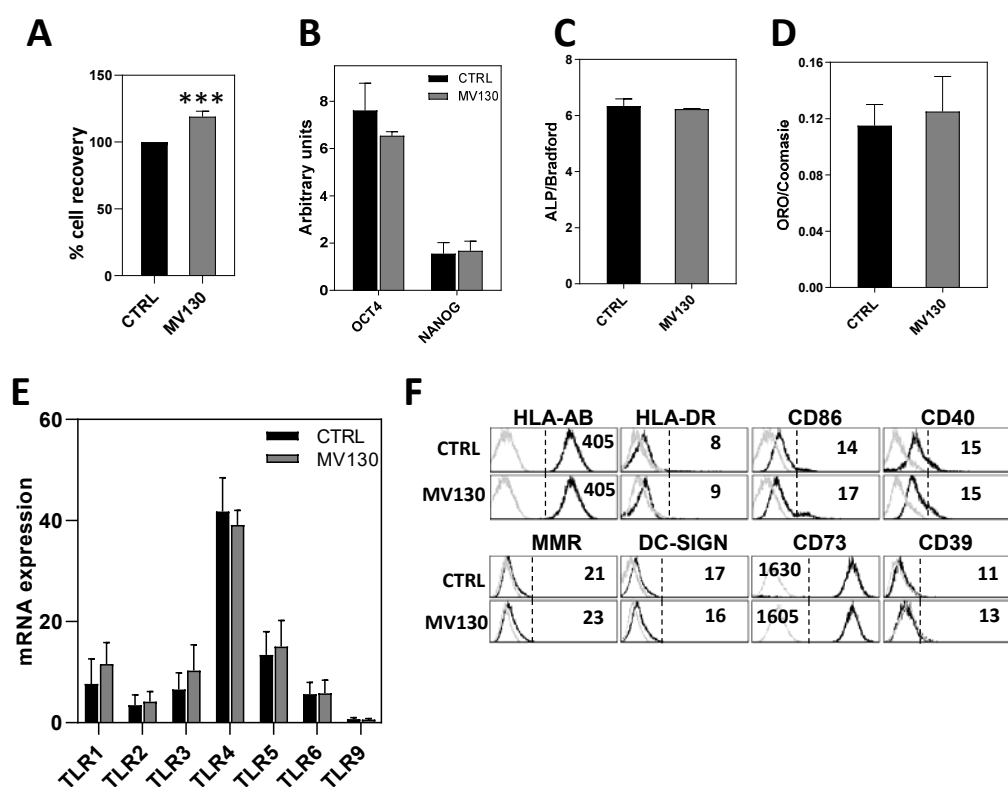

(A) Number of MSCs recovered from control or MV130 treated cultures after 24h. Data represent the percentage of MV130 treated cultures relative to control ones expressed as mean  $\pm$  SEM from 15 independent experiments. (B) mRNA expression of Oct-4 and NANOG in MV130-treated MSCs. Mean  $\pm$  SEM is represented (n=3). (C-D) MSCs were treated with or without MV130 as described in material & methods section, before undergoing adipogenic or osteogenic differentiation process. For osteogenic (C) and adipogenic (D) differentiation, ALP specific activity /protein concentration ratio and lipid content expressed as ORO/Coomassie blue stain ratio respectively, were measured (n=2 independent experiments). (E) mRNA expression of different TLRs in control and MV130-MSCs after 2h of treatment. Bars graph represent mean  $\pm$  SEM of three independent experiments. (F) 48h after treatment, the expression of different surface markers on MSCs was studied by flow cytometry. Gray histograms represent isotype controls. Representative histograms and MFI value are shown (n=3-4).

## SUPPLEMENTAL FIGURE S2

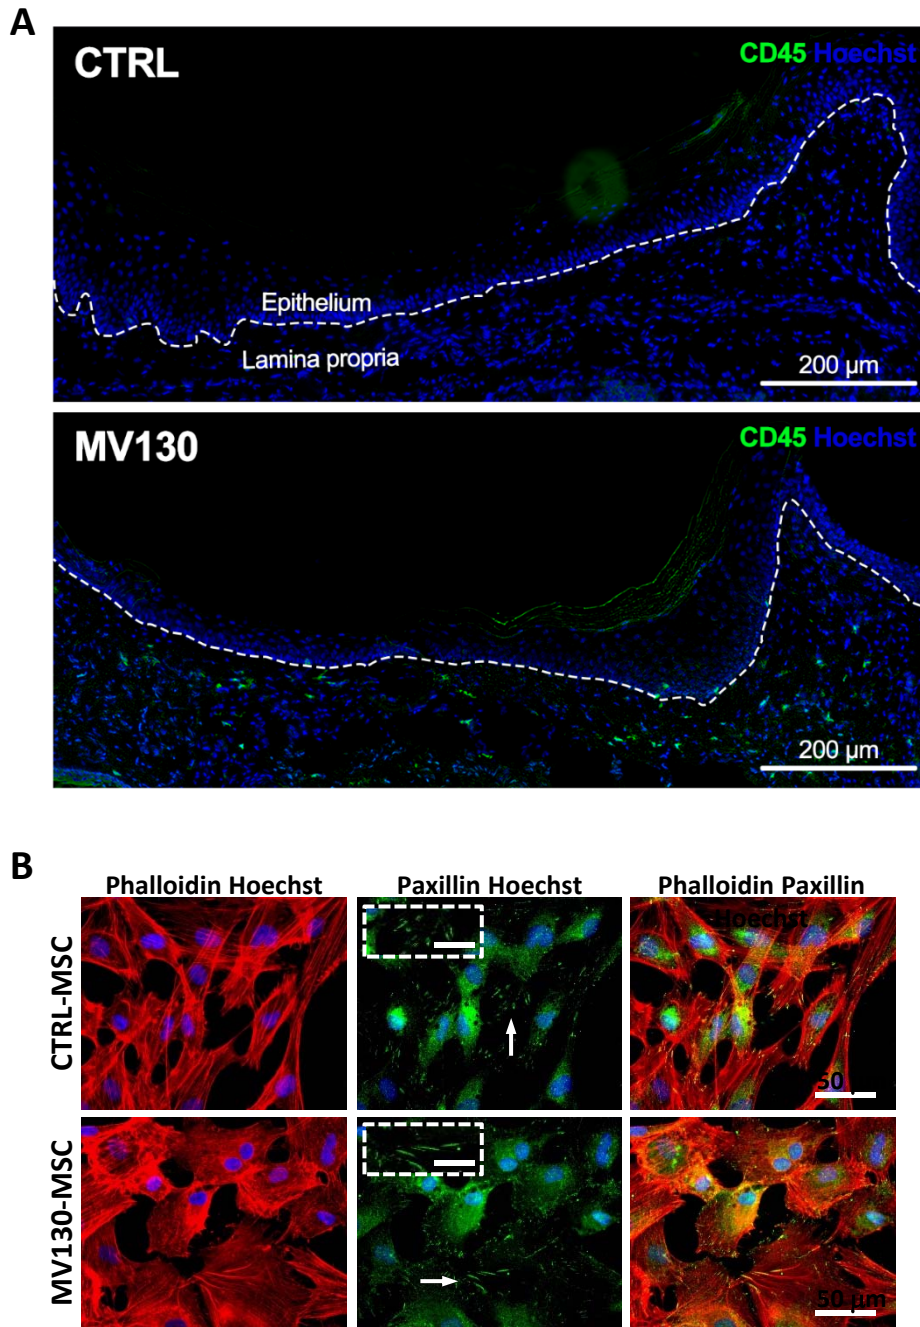

**(A)** Recruitment of CD45<sup>+</sup> cells in the oral mucosa of mice after sublingual vaccination with MV130. Images show histological sections of oral mucosa stained with anti-CD45 (green). Hoechst was used for nucleus staining (blue). Images are representative of 2 mice per group. **(B)** Effect of MV130 on paxillin expression in MSCs. MV130-treated MSCs were stained for F-actin (phalloidin, red) and paxillin (green). Hoechst was used for nucleus staining (blue). White arrows indicate area of insert image (green channel at higher magnification, scale bar: 25 µm). Data are representative of 3 independent experiments.

### SUPPLEMENTAL FIGURE S3

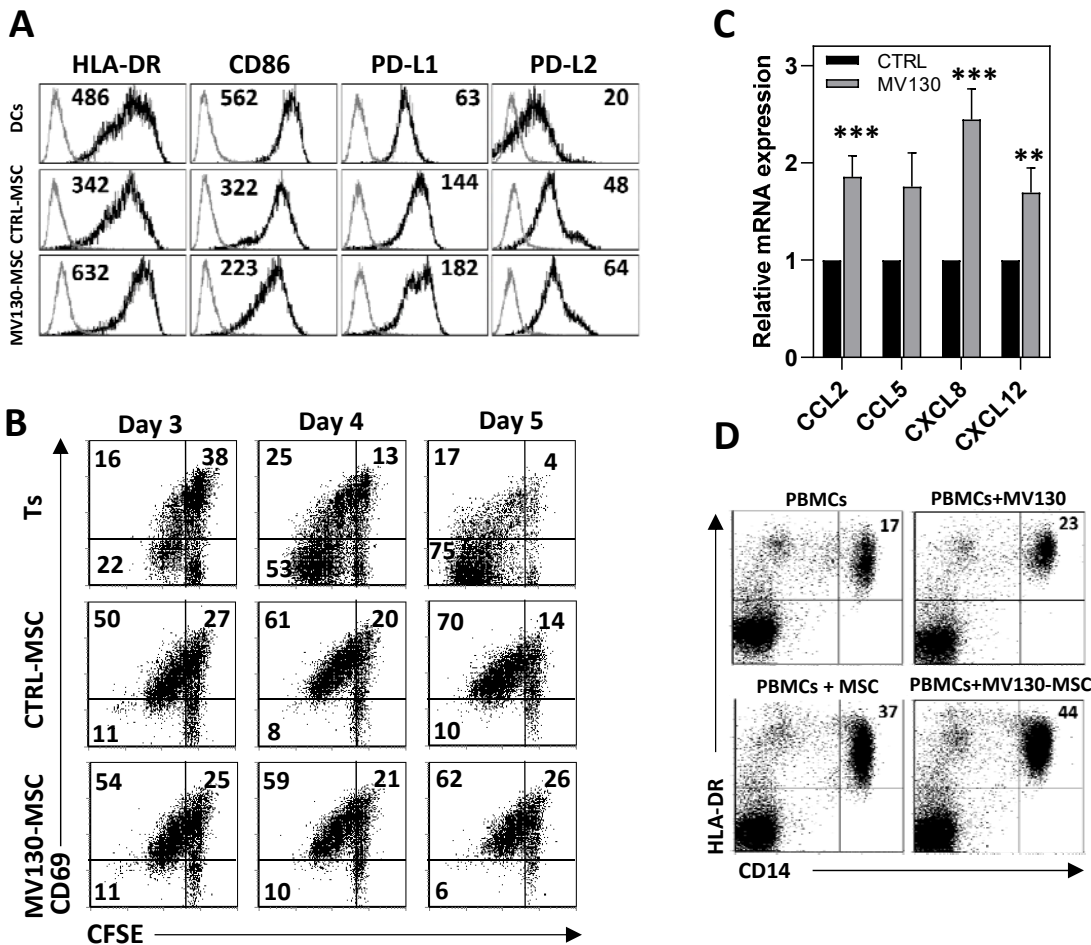

(A) Control and MV130 primed MSCs were cocultured with monocytes in the presence of GM-CSF+IL-4 to induce DC differentiation. At day 6, the expression of different surface markers was analyzed by flow cytometry (black), in CD90<sup>-</sup> population, compared with background fluorescence (light gray). MFI is shown in each histogram. Data are representative of five independent experiments. (B) Control or MV130-MSCs were cocultured with CFSE labelling T lymphocytes, stimulated with CD3/CD28 beads, for 3, 4 and 5 days. Stimulated T cells alone were carried out as control. Percentage of CFSE<sup>+</sup>CD69<sup>+</sup>, CFSE<sup>-</sup>CD69<sup>+</sup> and CFSE<sup>-</sup>CD69<sup>-</sup> populations are shown in each plot. Data are representative of four independent experiments. (C) mRNA expression for different chemokines in control and MV130-MSCs after 2h of treatment. Data represent mean  $\pm$  SEM respect to control cultures of 8 to 12 independent experiments. (D) PBMCs were placed in a transwell insert while control or MV130-MSCs were seeded in the bottom chamber. After 8h of migration, monocyte population (CD14<sup>+</sup>HLA-DR<sup>+</sup>) were analyzed by flow cytometry in the lower fraction. The percentage of monocytes is shown in each plot. PBMCs alone or migrating towards MV130 are also shown as control. Data are representative of four independent experiments. (\*\*p < 0,01; \*\*\*p < 0,05 by Wilcoxon test).

**Supplemental Table S1:** TaqMan Gene expression assay

| <b>Gene</b>    | <b>Reference</b> |
|----------------|------------------|
| CCL2           | Hs00234140_m1    |
| CCL5           | Hs00174575_m1    |
| CSF1           | Hs00174164_m1    |
| CXCL12         | Hs00171022_m1    |
| CXCL8          | Hs00174103_m1    |
| FGF2           | Hs00266645_m1    |
| IL1B           | Hs01555410_m1    |
| IL6            | Hs00985639_m1    |
| LGALS1         | Hs00355202_m1    |
| NANOG          | Hs02387400_g1    |
| POU5F1(Oct-4)  | Hs03005111_g1    |
| PTGS2 (COX2)   | Hs00153133_m1    |
| RACK1 (GNB2L1) | Hs00272002_m1    |
| TGFB1          | Hs00998133_m1    |
| TLR1           | Hs00413978_m1    |
| TLR2           | Hs01872448_s1    |
| TLR3           | Hs00152833_m1    |
| TLR4           | Hs00152939_m1    |
| TLR5           | Hs00152825_m1    |
| TLR6           | Hs00271977_s1    |
| TLR9           | Hs00152973_m1    |
| VEGFA          | Hs00900055_m1    |

**Supplemental Table S2.** Human and mouse antibodies used for flow cytometry

| <b>Human Target Molecule</b> | <b>Clone</b>   | <b>Manufacturer</b> |
|------------------------------|----------------|---------------------|
| Bcl-xL                       | H-5            |                     |
| CD163                        | GH1/G1         | Biolegend           |
| CD19                         | HIB19          |                     |
| CD1a                         | HI149          |                     |
| CD25                         | BC96           |                     |
| CD39                         | A1             |                     |
| CD4                          | OKT4           |                     |
| CD69                         | FN50           |                     |
| CD73                         | AD2            |                     |
| CD86                         | IT2.2          |                     |
| CD90                         | 5E10           |                     |
| DC-SIGN                      | 9E9A8          |                     |
| HLA-AB                       | W6/32          |                     |
| HLA-DR                       | L243           |                     |
| ICAM1                        | HCD54          |                     |
| MMR                          | 15-2           |                     |
| PDL1                         | 29E.2A3        |                     |
| PDL2                         | 4F.10C12       |                     |
| CD14                         | 47-3D6         |                     |
| CD3                          | 33-2A3         |                     |
| Bcl-2                        | Bcl-2/100      | BD Biosciences      |
| CD40                         | 5C3            |                     |
| VCAM1                        | 51-10C9        |                     |
| CD16                         | REA423         | Miltenyi Biotec     |
|                              |                |                     |
| <b>Mouse Target Molecule</b> | <b>Clone</b>   | <b>Manufacturer</b> |
| CD29                         | HM $\beta$ 1-1 | Biolegend           |
| CD3                          | 17A2           |                     |
| CD45                         | 30-F11         |                     |
| CD68                         | FA-11          |                     |
| F4/80                        | BM8            |                     |
| Gr-1                         | RB6-8C5        |                     |
| MHC class II (I-A/I-E)       | M5/114.15.2    |                     |
| Sca-1                        | D7             |                     |
